# Supplementary material
Source: publisher figshare collection journal article supplement (https://asha.figshare.com/articles/dataset/_/5899228)
Supplement: Supplementary file 1 [file 1]

**Supplemental Material S1.** Estimated pairwise differences for speech intelligibility (%) from the final model.

| Frequency | Estimated difference | Standard error | <i>df</i> | <i>t</i> | Lower CI | Upper CI | <i>p</i> | Effect size |
|-----------|----------------------|----------------|-----------|----------|----------|----------|----------|-------------|
| Low–mid   | 1.191                | 0.793          | 228.1     | 1.50     | –0.372   | 2.753    | .135     | 0.235       |
| Low–high  | 2.896                | 1.016          | 228.1     | 2.85     | 0.894    | 4.898    | .005     | 0.570       |
| Mid–high  | 1.706                | 0.885          | 228.2     | 1.93     | –0.038   | 3.449    | .055     | 0.336       |
