# Supplementary material
Source: publisher figshare collection journal article supplement (https://asha.figshare.com/articles/dataset/_/5899228)
Supplement: Supplementary file 2 [file 1]

**Supplemental Material S3.** Estimated pairwise differences for F2 transition extent (Hz) from the final model.

|                                        | <b>Estimate</b> | <b>Standard error</b> | <b>df</b> | <b>t</b> | <b>Lower CI</b> | <b>Upper CI</b> | <b>p</b> | <b>Effect size</b> |
|----------------------------------------|-----------------|-----------------------|-----------|----------|-----------------|-----------------|----------|--------------------|
| Sex female–male                        | 74.788          | 78.079                | 10.1      | 0.96     | –99.022         | 248.598         | .361     | 0.519              |
| Frequency low–mid                      | 45.202          | 23.474                | 223.9     | 1.93     | –1.056          | 91.460          | .055     | 0.314              |
| Frequency low–high                     | 107.784         | 29.099                | 223.8     | 3.70     | 50.440          | 165.127         | < .001   | 0.748              |
| Frequency mid–high                     | 62.581          | 25.479                | 224.0     | 2.46     | 12.372          | 112.791         | .015     | 0.434              |
| Pulse.width low–mid                    | 6.279           | 21.748                | 224.2     | 0.29     | –36.579         | 49.136          | .773     | 0.044              |
| Pulse.width low–high                   | –26.645         | 26.767                | 223.8     | –1.00    | –79.393         | 26.102          | .321     | –0.185             |
| Pulse.width mid–high                   | –32.924         | 27.914                | 223.9     | –1.18    | –87.932         | 22.084          | .24      | –0.228             |
| Sex:pulse.width female low–male low    | 146.507         | 79.927                | 11.1      | 1.83     | –29.307         | 322.320         | .094     | 1.016              |
| Sex:pulse.width female low–female mid  | 45.592          | 32.683                | 224.3     | 1.39     | –18.813         | 109.997         | .164     | 0.316              |
| Sex:pulse.width female low–male mid    | 113.472         | 80.857                | 11.6      | 1.40     | –63.415         | 290.359         | .187     | 0.787              |
| Sex:pulse.width female low–female high | 41.620          | 37.048                | 223.7     | 1.12     | –31.387         | 114.627         | .262     | 0.289              |
| Sex:pulse.width female low–male high   | 51.596          | 84.629                | 13.9      | 0.61     | –130.070        | 233.263         | .552     | 0.358              |
| Sex:pulse.width male low–female mid    | –100.915        | 81.604                | 12.0      | –1.24    | –278.708        | 76.878          | .24      | –0.700             |
| Sex:pulse.width male low–male mid      | –33.035         | 28.118                | 224.1     | –1.17    | –88.444         | 22.375          | .241     | –0.229             |
| Sex:pulse.width male low–female high   | –104.887        | 83.487                | 13.1      | –1.26    | –285.044        | 75.270          | .231     | –0.728             |
| Sex:pulse.width male low–male high     | –94.910         | 37.392                | 223.9     | –2.54    | –168.596        | –21.225         | .012     | –0.658             |
| Sex:pulse.width female mid–male mid    | 67.880          | 82.314                | 12.4      | 0.82     | –110.784        | 246.544         | .425     | 0.471              |
| Sex:pulse.width female mid–female high | –3.972          | 39.956                | 223.9     | –0.10    | –82.710         | 74.766          | .921     | –0.028             |
| Sex:pulse.width female mid–male high   | 6.005           | 85.816                | 14.7      | 0.07     | –177.284        | 189.293         | .945     | 0.042              |
| Sex:pulse.width male mid–female high   | –71.852         | 84.165                | 13.6      | –0.85    | –252.894        | 109.189         | .408     | –0.498             |
| Sex:pulse.width male mid–male high     | –61.876         | 38.681                | 223.9     | –1.60    | –138.101        | 14.350          | .111     | –0.429             |
| Sex:pulse.width female high–male high  | 9.977           | 87.456                | 15.8      | 0.11     | –175.615        | 195.568         | .911     | 0.069              |
