# Supplementary material
Source: publisher figshare collection journal article supplement (https://asha.figshare.com/articles/dataset/_/5899228)
Supplement: Supplementary file 3 [file 1]

**Supplemental Material S2.** Estimated pairwise differences for four-vowel articulation index (VAI) from the final model.

|                                      | <b>Estimate</b> | <b>Standard error</b> | <b>df</b> | <b>t</b> | <b>Lower CI</b> | <b>Upper CI</b> | <b>p</b> | <b>Effect size</b> |
|--------------------------------------|-----------------|-----------------------|-----------|----------|-----------------|-----------------|----------|--------------------|
| Sex female–male                      | 0.039           | 0.066                 | 10.2      | 0.59     | −0.107          | 0.185           | .568     | 0.397              |
| Frequency low–mid                    | 0.015           | 0.016                 | 226.2     | 0.98     | −0.015          | 0.046           | .326     | 0.153              |
| Frequency low–high                   | 0.048           | 0.020                 | 226.2     | 2.41     | 0.009           | 0.087           | .017     | 0.488              |
| Frequency mid–high                   | 0.032           | 0.017                 | 226.3     | 1.88     | −0.002          | 0.066           | .061     | 0.325              |
| Sex:frequency female low–male low    | 0.083           | 0.069                 | 12.6      | 1.21     | −0.067          | 0.233           | .25      | 0.844              |
| Sex:frequency female low–female mid  | 0.032           | 0.023                 | 226.2     | 1.39     | −0.014          | 0.078           | .166     | 0.325              |
| Sex:frequency female low–male mid    | 0.082           | 0.068                 | 11.8      | 1.20     | −0.067          | 0.230           | .255     | 0.834              |
| Sex:frequency female low–female high | 0.097           | 0.030                 | 226.1     | 3.29     | 0.039           | 0.156           | .001     | 0.986              |
| Sex:frequency female low–male high   | 0.081           | 0.070                 | 13.3      | 1.16     | −0.070          | 0.233           | .266     | 0.824              |
| Sex:frequency male low–female mid    | −0.051          | 0.067                 | 11.4      | −0.76    | −0.199          | 0.097           | .465     | −0.519             |
| Sex:frequency male low–male mid      | −0.002          | 0.020                 | 226.2     | −0.10    | −0.042          | 0.038           | .924     | −0.020             |
| Sex:frequency male low–female high   | 0.014           | 0.070                 | 13.1      | 0.20     | −0.137          | 0.165           | .845     | 0.142              |
| Sex:frequency male low–male high     | −0.002          | 0.026                 | 226.3     | −0.08    | −0.054          | 0.050           | .939     | −0.020             |
| Sex:frequency female mid–male mid    | 0.049           | 0.066                 | 10.6      | 0.74     | −0.098          | 0.196           | .476     | 0.498              |
| Sex:frequency female mid–female high | 0.065           | 0.025                 | 226.2     | 2.56     | 0.015           | 0.115           | .011     | 0.661              |
| Sex:frequency female mid–male high   | 0.049           | 0.068                 | 12.0      | 0.72     | −0.100          | 0.198           | .488     | 0.498              |
| Sex:frequency male mid–female high   | 0.016           | 0.069                 | 12.2      | 0.23     | −0.134          | 0.165           | .821     | 0.163              |
| Sex:frequency male mid–male high     | 0.000           | 0.023                 | 226.5     | 0.00     | −0.046          | 0.046           | .998     | 0.000              |
| Sex:frequency female high–male high  | −0.016          | 0.071                 | 13.8      | −0.23    | −0.168          | 0.136           | .825     | −0.163             |
